# Supplementary material for: Rationally Designed Turn Promoting Mutation in the Amyloid-β Peptide Sequence Stabilizes Oligomers in Solution
Source: PLoS One. 2011 Jul 22;6(7):e21776. doi: 10.1371/journal.pone.0021776 (PMC3142112; doi:10.1371/journal.pone.0021776)
Supplement: PDB S2 — PDB file of five snapshots of the V36-V38 turn from NMR refinement, as displayed in Figure 5b. (PDB) [file pone.0021776.s002.pdb]

HEADER    AMYLOID-BETA MUTANT, RESIDUES 34-42
TITLE     RATIONALLY DESIGNED TURN PROMOTING MUTATION IN THE
TITLE    2 AMYLOID-BETA PEPTIDE SEQUENCE STABILIZES
TITLE    3 OLIGOMERS IN SOLUTION
COMPND    AMYLOID-BETA PEPTIDE, D-PROLINE MUTANT
COMPND   2 MET35NLE, GLY37DPR
AUTHOR    J.RAJADAS, C.W.LIU, P.A.NOVICK, N.W.KELLEY,
AUTHOR   2 M.INAYATHULLAH, M.C.LEMIEUX, V.S.PANDE
REVDAT    11-APRIL-2011
JOURNAL   PLOS ONE
REMARK    CREATED USING GROMACS AS DESCRIBED IN THE
REMARK    PUBLICATION REFERENCED ABOVE
REMARK    EXPLICIT SOLVENT IN A DODECAHEDRAL BOX
REMARK    DISTANCE RESTRAINTS INPLEMENTED ACCORDING TO
REMARK    NMR DATA.  SOLVENT ATOMS OMITTED HERE.
REMARK    SEQUENCE INCLUDED IN THIS FILE
REMARK    ACE LEU NLE VAL DPR GLY VAL VAL ILE NME
REMARK    GENERATED BY TRJCONV
REMARK    THIS IS A SIMULATION BOX
CRYST1   56.423   56.423   56.423  60.00  60.00  90.00 P 1           1
MODEL        1
ATOM      1 1HH3 ACE     1      41.890  37.610  24.420  1.00  0.00            
ATOM      2  CH3 ACE     1      42.180  37.040  25.300  1.00  0.00            
ATOM      3 2HH3 ACE     1      42.560  36.030  25.110  1.00  0.00            
ATOM      4 3HH3 ACE     1      41.380  36.930  26.020  1.00  0.00            
ATOM      5  C   ACE     1      43.270  37.700  26.130  1.00  0.00            
ATOM      6  O   ACE     1      44.410  37.270  25.960  1.00  0.00            
ATOM      7  N   LEU     2      43.030  38.710  26.970  1.00  0.00            
ATOM      8  H   LEU     2      43.850  39.110  27.390  1.00  0.00            
ATOM      9  CA  LEU     2      41.720  39.200  27.360  1.00  0.00            
ATOM     10  HA  LEU     2      41.030  38.370  27.460  1.00  0.00            
ATOM     11  CB  LEU     2      41.970  40.000  28.650  1.00  0.00            
ATOM     12  HB1 LEU     2      41.240  40.810  28.600  1.00  0.00            
ATOM     13  HB2 LEU     2      42.930  40.510  28.610  1.00  0.00            
ATOM     14  CG  LEU     2      41.960  39.200  29.950  1.00  0.00            
ATOM     15  HG  LEU     2      42.880  38.620  29.950  1.00  0.00            
ATOM     16  CD1 LEU     2      41.800  40.150  31.140  1.00  0.00            
ATOM     17 1HD1 LEU     2      42.150  39.700  32.070  1.00  0.00            
ATOM     18 2HD1 LEU     2      42.500  40.900  30.770  1.00  0.00            
ATOM     19 3HD1 LEU     2      40.770  40.480  31.210  1.00  0.00            
ATOM     20  CD2 LEU     2      40.850  38.180  30.130  1.00  0.00            
ATOM     21 1HD2 LEU     2      40.980  37.350  29.430  1.00  0.00            
ATOM     22 2HD2 LEU     2      40.950  37.770  31.130  1.00  0.00            
ATOM     23 3HD2 LEU     2      39.850  38.560  29.880  1.00  0.00            
ATOM     24  C   LEU     2      41.070  40.100  26.320  1.00  0.00            
ATOM     25  O   LEU     2      39.840  40.100  26.370  1.00  0.00            
ATOM     26  N   NLE     3      41.840  40.720  25.440  1.00  0.00            
ATOM     27  H   NLE     3      42.840  40.650  25.580  1.00  0.00            
ATOM     28  CA  NLE     3      41.380  41.500  24.300  1.00  0.00            
ATOM     29  HA  NLE     3      40.640  40.880  23.800  1.00  0.00            
ATOM     30  CB  NLE     3      40.590  42.740  24.700  1.00  0.00            
ATOM     31  HB1 NLE     3      39.890  42.420  25.470  1.00  0.00            
ATOM     32  HB2 NLE     3      40.010  43.000  23.810  1.00  0.00            
ATOM     33  CG  NLE     3      41.320  43.960  25.280  1.00  0.00            
ATOM     34  HG1 NLE     3      41.600  43.660  26.290  1.00  0.00            
ATOM     35  HG2 NLE     3      42.170  44.190  24.650  1.00  0.00            
ATOM     36  CD  NLE     3      40.410  45.190  25.400  1.00  0.00            
ATOM     37  HD1 NLE     3      39.670  45.000  26.180  1.00  0.00            
ATOM     38  HD2 NLE     3      39.860  45.450  24.510  1.00  0.00            
ATOM     39  CE  NLE     3      41.250  46.380  25.880  1.00  0.00            
ATOM     40  HE1 NLE     3      41.990  46.010  26.580  1.00  0.00            
ATOM     41  HE2 NLE     3      40.650  47.120  26.420  1.00  0.00            
ATOM     42  HE3 NLE     3      41.620  46.810  24.960  1.00  0.00            
ATOM     43  C   NLE     3      42.490  41.870  23.330  1.00  0.00            
ATOM     44  O   NLE     3      43.640  41.840  23.780  1.00  0.00            
ATOM     45  N   VAL     4      42.170  42.480  22.180  1.00  0.00            
ATOM     46  H   VAL     4      41.210  42.410  21.910  1.00  0.00            
ATOM     47  CA  VAL     4      43.110  43.350  21.490  1.00  0.00            
ATOM     48  HA  VAL     4      43.990  43.600  22.050  1.00  0.00            
ATOM     49  CB  VAL     4      43.590  42.670  20.210  1.00  0.00            
ATOM     50  HB  VAL     4      44.130  43.410  19.620  1.00  0.00            
ATOM     51  CG1 VAL     4      44.520  41.520  20.580  1.00  0.00            
ATOM     52 1HG1 VAL     4      44.000  40.630  20.940  1.00  0.00            
ATOM     53 2HG1 VAL     4      45.060  41.060  19.750  1.00  0.00            
ATOM     54 3HG1 VAL     4      45.200  41.870  21.360  1.00  0.00            
ATOM     55  CG2 VAL     4      42.500  42.090  19.320  1.00  0.00            
ATOM     56 1HG2 VAL     4      42.210  41.110  19.730  1.00  0.00            
ATOM     57 2HG2 VAL     4      41.660  42.790  19.260  1.00  0.00            
ATOM     58 3HG2 VAL     4      42.920  41.880  18.330  1.00  0.00            
ATOM     59  C   VAL     4      42.440  44.690  21.210  1.00  0.00            
ATOM     60  O   VAL     4      41.230  44.690  21.000  1.00  0.00            
ATOM     61  N   PRO     5      43.030  45.880  21.190  1.00  0.00            
ATOM     62  CD  PRO     5      42.340  47.160  21.290  1.00  0.00            
ATOM     63  HD1 PRO     5      41.740  47.230  22.190  1.00  0.00            
ATOM     64  HD2 PRO     5      41.720  47.410  20.430  1.00  0.00            
ATOM     65  CG  PRO     5      43.400  48.250  21.410  1.00  0.00            
ATOM     66  HG1 PRO     5      43.100  49.080  22.060  1.00  0.00            
ATOM     67  HG2 PRO     5      43.550  48.510  20.370  1.00  0.00            
ATOM     68  CB  PRO     5      44.580  47.490  22.000  1.00  0.00            
ATOM     69  HB1 PRO     5      44.600  47.390  23.090  1.00  0.00            
ATOM     70  HB2 PRO     5      45.530  48.000  21.810  1.00  0.00            
ATOM     71  CA  PRO     5      44.450  46.120  21.340  1.00  0.00            
ATOM     72  HA  PRO     5      44.910  45.390  22.020  1.00  0.00            
ATOM     73  C   PRO     5      45.240  46.140  20.040  1.00  0.00            
ATOM     74  O   PRO     5      46.470  46.120  20.160  1.00  0.00            
ATOM     75  N   GLY     6      44.680  45.970  18.840  1.00  0.00            
ATOM     76  H   GLY     6      43.680  46.090  18.720  1.00  0.00            
ATOM     77  CA  GLY     6      45.370  45.710  17.600  1.00  0.00            
ATOM     78  HA1 GLY     6      46.430  45.900  17.690  1.00  0.00            
ATOM     79  HA2 GLY     6      44.860  46.280  16.830  1.00  0.00            
ATOM     80  C   GLY     6      45.130  44.240  17.270  1.00  0.00            
ATOM     81  O   GLY     6      45.980  43.470  17.710  1.00  0.00            
ATOM     82  N   VAL     7      44.090  43.800  16.560  1.00  0.00            
ATOM     83  H   VAL     7      44.070  42.810  16.400  1.00  0.00            
ATOM     84  CA  VAL     7      43.000  44.520  15.920  1.00  0.00            
ATOM     85  HA  VAL     7      42.680  45.270  16.650  1.00  0.00            
ATOM     86  CB  VAL     7      43.310  45.290  14.640  1.00  0.00            
ATOM     87  HB  VAL     7      44.100  46.020  14.860  1.00  0.00            
ATOM     88  CG1 VAL     7      43.780  44.420  13.470  1.00  0.00            
ATOM     89 1HG1 VAL     7      43.950  45.040  12.590  1.00  0.00            
ATOM     90 2HG1 VAL     7      44.770  44.010  13.660  1.00  0.00            
ATOM     91 3HG1 VAL     7      43.120  43.570  13.320  1.00  0.00            
ATOM     92  CG2 VAL     7      42.170  46.190  14.190  1.00  0.00            
ATOM     93 1HG2 VAL     7      41.280  45.590  13.950  1.00  0.00            
ATOM     94 2HG2 VAL     7      41.960  46.970  14.930  1.00  0.00            
ATOM     95 3HG2 VAL     7      42.420  46.660  13.240  1.00  0.00            
ATOM     96  C   VAL     7      41.780  43.620  15.800  1.00  0.00            
ATOM     97  O   VAL     7      41.910  42.440  15.510  1.00  0.00            
ATOM     98  N   VAL     8      40.600  44.220  16.030  1.00  0.00            
ATOM     99  H   VAL     8      40.460  45.210  16.150  1.00  0.00            
ATOM    100  CA  VAL     8      39.330  43.530  16.010  1.00  0.00            
ATOM    101  HA  VAL     8      39.460  42.460  16.150  1.00  0.00            
ATOM    102  CB  VAL     8      38.490  44.180  17.110  1.00  0.00            
ATOM    103  HB  VAL     8      38.290  45.230  16.890  1.00  0.00            
ATOM    104  CG1 VAL     8      37.190  43.410  17.290  1.00  0.00            
ATOM    105 1HG1 VAL     8      36.480  43.830  18.000  1.00  0.00            
ATOM    106 2HG1 VAL     8      36.700  43.240  16.330  1.00  0.00            
ATOM    107 3HG1 VAL     8      37.530  42.470  17.740  1.00  0.00            
ATOM    108  CG2 VAL     8      39.170  44.280  18.480  1.00  0.00            
ATOM    109 1HG2 VAL     8      39.960  45.020  18.590  1.00  0.00            
ATOM    110 2HG2 VAL     8      38.510  44.370  19.340  1.00  0.00            
ATOM    111 3HG2 VAL     8      39.650  43.310  18.640  1.00  0.00            
ATOM    112  C   VAL     8      38.590  43.830  14.720  1.00  0.00            
ATOM    113  O   VAL     8      38.510  44.990  14.310  1.00  0.00            
ATOM    114  N   ILE     9      38.030  42.750  14.180  1.00  0.00            
ATOM    115  H   ILE     9      38.290  41.860  14.570  1.00  0.00            
ATOM    116  CA  ILE     9      37.160  42.880  13.020  1.00  0.00            
ATOM    117  HA  ILE     9      36.960  43.940  12.860  1.00  0.00            
ATOM    118  CB  ILE     9      37.750  42.300  11.740  1.00  0.00            
ATOM    119  HB  ILE     9      37.010  42.250  10.960  1.00  0.00            
ATOM    120  CG2 ILE     9      38.840  43.260  11.230  1.00  0.00            
ATOM    121 1HG2 ILE     9      39.570  43.350  12.030  1.00  0.00            
ATOM    122 2HG2 ILE     9      39.360  42.870  10.370  1.00  0.00            
ATOM    123 3HG2 ILE     9      38.370  44.220  10.990  1.00  0.00            
ATOM    124  CG1 ILE     9      38.260  40.880  12.010  1.00  0.00            
ATOM    125 1HG1 ILE     9      37.490  40.270  12.470  1.00  0.00            
ATOM    126 2HG1 ILE     9      39.010  40.850  12.800  1.00  0.00            
ATOM    127  CD  ILE     9      38.780  40.100  10.810  1.00  0.00            
ATOM    128  HD1 ILE     9      37.960  40.010  10.100  1.00  0.00            
ATOM    129  HD2 ILE     9      39.650  40.620  10.390  1.00  0.00            
ATOM    130  HD3 ILE     9      39.220  39.170  11.140  1.00  0.00            
ATOM    131  C   ILE     9      35.740  42.390  13.270  1.00  0.00            
ATOM    132  O   ILE     9      34.770  42.560  12.520  1.00  0.00            
ATOM    133  N   NME    10      35.610  41.660  14.380  1.00  0.00            
ATOM    134  H   NME    10      36.440  41.520  14.950  1.00  0.00            
ATOM    135  CH3 NME    10      34.350  41.140  14.840  1.00  0.00            
ATOM    136 1HH3 NME    10      33.840  40.620  14.020  1.00  0.00            
ATOM    137 2HH3 NME    10      34.330  40.560  15.760  1.00  0.00            
ATOM    138 3HH3 NME    10      33.670  41.960  15.100  1.00  0.00            
TER
ENDMDL
MODEL        2
ATOM      1 1HH3 ACE     1      41.930  36.060  24.130  1.00  0.00            
ATOM      2  CH3 ACE     1      41.690  36.600  25.050  1.00  0.00            
ATOM      3 2HH3 ACE     1      41.390  35.820  25.740  1.00  0.00            
ATOM      4 3HH3 ACE     1      40.930  37.360  24.930  1.00  0.00            
ATOM      5  C   ACE     1      43.070  37.090  25.460  1.00  0.00            
ATOM      6  O   ACE     1      44.150  36.710  24.990  1.00  0.00            
ATOM      7  N   LEU     2      43.100  38.150  26.270  1.00  0.00            
ATOM      8  H   LEU     2      44.020  38.480  26.520  1.00  0.00            
ATOM      9  CA  LEU     2      41.980  38.810  26.920  1.00  0.00            
ATOM     10  HA  LEU     2      41.250  38.020  27.080  1.00  0.00            
ATOM     11  CB  LEU     2      42.560  39.280  28.240  1.00  0.00            
ATOM     12  HB1 LEU     2      43.310  39.990  27.890  1.00  0.00            
ATOM     13  HB2 LEU     2      43.060  38.490  28.800  1.00  0.00            
ATOM     14  CG  LEU     2      41.680  39.960  29.280  1.00  0.00            
ATOM     15  HG  LEU     2      41.220  40.890  28.900  1.00  0.00            
ATOM     16  CD1 LEU     2      40.590  39.060  29.840  1.00  0.00            
ATOM     17 1HD1 LEU     2      41.070  38.430  30.590  1.00  0.00            
ATOM     18 2HD1 LEU     2      40.000  39.720  30.470  1.00  0.00            
ATOM     19 3HD1 LEU     2      40.020  38.540  29.060  1.00  0.00            
ATOM     20  CD2 LEU     2      42.560  40.450  30.420  1.00  0.00            
ATOM     21 1HD2 LEU     2      43.100  39.710  31.020  1.00  0.00            
ATOM     22 2HD2 LEU     2      43.310  41.200  30.160  1.00  0.00            
ATOM     23 3HD2 LEU     2      41.970  41.060  31.100  1.00  0.00            
ATOM     24  C   LEU     2      41.390  39.950  26.080  1.00  0.00            
ATOM     25  O   LEU     2      40.180  40.150  26.070  1.00  0.00            
ATOM     26  N   NLE     3      42.270  40.650  25.370  1.00  0.00            
ATOM     27  H   NLE     3      43.230  40.350  25.490  1.00  0.00            
ATOM     28  CA  NLE     3      42.110  41.730  24.420  1.00  0.00            
ATOM     29  HA  NLE     3      41.400  41.470  23.650  1.00  0.00            
ATOM     30  CB  NLE     3      41.650  43.040  25.060  1.00  0.00            
ATOM     31  HB1 NLE     3      40.580  43.000  25.300  1.00  0.00            
ATOM     32  HB2 NLE     3      41.780  43.870  24.370  1.00  0.00            
ATOM     33  CG  NLE     3      42.440  43.420  26.300  1.00  0.00            
ATOM     34  HG1 NLE     3      42.150  44.420  26.610  1.00  0.00            
ATOM     35  HG2 NLE     3      42.030  42.880  27.160  1.00  0.00            
ATOM     36  CD  NLE     3      43.960  43.250  26.280  1.00  0.00            
ATOM     37  HD1 NLE     3      44.390  43.830  25.470  1.00  0.00            
ATOM     38  HD2 NLE     3      44.210  42.190  26.240  1.00  0.00            
ATOM     39  CE  NLE     3      44.540  43.830  27.560  1.00  0.00            
ATOM     40  HE1 NLE     3      43.930  43.550  28.420  1.00  0.00            
ATOM     41  HE2 NLE     3      44.530  44.920  27.570  1.00  0.00            
ATOM     42  HE3 NLE     3      45.580  43.480  27.620  1.00  0.00            
ATOM     43  C   NLE     3      43.310  41.860  23.490  1.00  0.00            
ATOM     44  O   NLE     3      44.430  41.420  23.770  1.00  0.00            
ATOM     45  N   VAL     4      43.090  42.570  22.380  1.00  0.00            
ATOM     46  H   VAL     4      42.130  42.850  22.290  1.00  0.00            
ATOM     47  CA  VAL     4      44.030  43.050  21.380  1.00  0.00            
ATOM     48  HA  VAL     4      45.000  42.670  21.710  1.00  0.00            
ATOM     49  CB  VAL     4      43.760  42.430  20.010  1.00  0.00            
ATOM     50  HB  VAL     4      44.550  42.880  19.400  1.00  0.00            
ATOM     51  CG1 VAL     4      43.830  40.910  20.050  1.00  0.00            
ATOM     52 1HG1 VAL     4      44.720  40.450  20.490  1.00  0.00            
ATOM     53 2HG1 VAL     4      42.960  40.540  20.590  1.00  0.00            
ATOM     54 3HG1 VAL     4      43.860  40.460  19.050  1.00  0.00            
ATOM     55  CG2 VAL     4      42.420  42.870  19.430  1.00  0.00            
ATOM     56 1HG2 VAL     4      41.560  42.430  19.930  1.00  0.00            
ATOM     57 2HG2 VAL     4      42.240  43.940  19.540  1.00  0.00            
ATOM     58 3HG2 VAL     4      42.340  42.580  18.380  1.00  0.00            
ATOM     59  C   VAL     4      44.140  44.570  21.450  1.00  0.00            
ATOM     60  O   VAL     4      43.120  45.170  21.760  1.00  0.00            
ATOM     61  N   PRO     5      45.220  45.230  21.040  1.00  0.00            
ATOM     62  CD  PRO     5      45.320  46.630  21.390  1.00  0.00            
ATOM     63  HD1 PRO     5      45.240  46.710  22.470  1.00  0.00            
ATOM     64  HD2 PRO     5      44.650  47.380  20.980  1.00  0.00            
ATOM     65  CG  PRO     5      46.730  47.070  20.990  1.00  0.00            
ATOM     66  HG1 PRO     5      47.120  47.920  21.550  1.00  0.00            
ATOM     67  HG2 PRO     5      46.670  47.410  19.960  1.00  0.00            
ATOM     68  CB  PRO     5      47.510  45.760  21.040  1.00  0.00            
ATOM     69  HB1 PRO     5      47.820  45.490  22.050  1.00  0.00            
ATOM     70  HB2 PRO     5      48.380  45.800  20.400  1.00  0.00            
ATOM     71  CA  PRO     5      46.500  44.720  20.570  1.00  0.00            
ATOM     72  HA  PRO     5      46.670  43.800  21.110  1.00  0.00            
ATOM     73  C   PRO     5      46.630  44.640  19.050  1.00  0.00            
ATOM     74  O   PRO     5      47.610  44.070  18.560  1.00  0.00            
ATOM     75  N   GLY     6      45.710  45.280  18.330  1.00  0.00            
ATOM     76  H   GLY     6      44.940  45.710  18.800  1.00  0.00            
ATOM     77  CA  GLY     6      45.600  45.160  16.880  1.00  0.00            
ATOM     78  HA1 GLY     6      46.580  45.360  16.460  1.00  0.00            
ATOM     79  HA2 GLY     6      44.930  45.950  16.530  1.00  0.00            
ATOM     80  C   GLY     6      45.210  43.780  16.390  1.00  0.00            
ATOM     81  O   GLY     6      46.030  42.880  16.220  1.00  0.00            
ATOM     82  N   VAL     7      43.960  43.490  16.010  1.00  0.00            
ATOM     83  H   VAL     7      43.850  42.550  15.640  1.00  0.00            
ATOM     84  CA  VAL     7      42.810  44.350  15.900  1.00  0.00            
ATOM     85  HA  VAL     7      42.880  45.080  16.700  1.00  0.00            
ATOM     86  CB  VAL     7      42.920  45.160  14.610  1.00  0.00            
ATOM     87  HB  VAL     7      43.980  45.390  14.560  1.00  0.00            
ATOM     88  CG1 VAL     7      42.570  44.580  13.230  1.00  0.00            
ATOM     89 1HG1 VAL     7      43.220  43.750  12.910  1.00  0.00            
ATOM     90 2HG1 VAL     7      41.590  44.110  13.290  1.00  0.00            
ATOM     91 3HG1 VAL     7      42.610  45.350  12.480  1.00  0.00            
ATOM     92  CG2 VAL     7      42.150  46.470  14.660  1.00  0.00            
ATOM     93 1HG2 VAL     7      41.060  46.330  14.630  1.00  0.00            
ATOM     94 2HG2 VAL     7      42.230  46.860  15.680  1.00  0.00            
ATOM     95 3HG2 VAL     7      42.560  47.270  14.040  1.00  0.00            
ATOM     96  C   VAL     7      41.510  43.550  15.870  1.00  0.00            
ATOM     97  O   VAL     7      41.560  42.360  15.570  1.00  0.00            
ATOM     98  N   VAL     8      40.390  44.140  16.280  1.00  0.00            
ATOM     99  H   VAL     8      40.430  45.150  16.300  1.00  0.00            
ATOM    100  CA  VAL     8      39.120  43.440  16.260  1.00  0.00            
ATOM    101  HA  VAL     8      39.330  42.390  16.430  1.00  0.00            
ATOM    102  CB  VAL     8      38.220  43.870  17.410  1.00  0.00            
ATOM    103  HB  VAL     8      38.170  44.960  17.300  1.00  0.00            
ATOM    104  CG1 VAL     8      36.770  43.400  17.390  1.00  0.00            
ATOM    105 1HG1 VAL     8      36.340  43.840  18.300  1.00  0.00            
ATOM    106 2HG1 VAL     8      36.270  43.820  16.520  1.00  0.00            
ATOM    107 3HG1 VAL     8      36.680  42.320  17.500  1.00  0.00            
ATOM    108  CG2 VAL     8      38.900  43.410  18.700  1.00  0.00            
ATOM    109 1HG2 VAL     8      38.230  43.350  19.560  1.00  0.00            
ATOM    110 2HG2 VAL     8      39.180  42.360  18.630  1.00  0.00            
ATOM    111 3HG2 VAL     8      39.790  43.990  18.900  1.00  0.00            
ATOM    112  C   VAL     8      38.340  43.620  14.950  1.00  0.00            
ATOM    113  O   VAL     8      37.960  44.750  14.640  1.00  0.00            
ATOM    114  N   ILE     9      38.210  42.520  14.220  1.00  0.00            
ATOM    115  H   ILE     9      38.620  41.700  14.640  1.00  0.00            
ATOM    116  CA  ILE     9      37.360  42.320  13.060  1.00  0.00            
ATOM    117  HA  ILE     9      36.610  43.110  12.970  1.00  0.00            
ATOM    118  CB  ILE     9      38.120  42.300  11.740  1.00  0.00            
ATOM    119  HB  ILE     9      37.360  42.100  10.990  1.00  0.00            
ATOM    120  CG2 ILE     9      38.590  43.680  11.300  1.00  0.00            
ATOM    121 1HG2 ILE     9      37.760  44.340  11.060  1.00  0.00            
ATOM    122 2HG2 ILE     9      39.350  44.050  12.000  1.00  0.00            
ATOM    123 3HG2 ILE     9      39.100  43.580  10.340  1.00  0.00            
ATOM    124  CG1 ILE     9      39.170  41.190  11.740  1.00  0.00            
ATOM    125 1HG1 ILE     9      38.710  40.270  12.100  1.00  0.00            
ATOM    126 2HG1 ILE     9      40.080  41.540  12.250  1.00  0.00            
ATOM    127  CD  ILE     9      39.670  40.790  10.360  1.00  0.00            
ATOM    128  HD1 ILE     9      40.420  41.520  10.050  1.00  0.00            
ATOM    129  HD2 ILE     9      40.190  39.830  10.410  1.00  0.00            
ATOM    130  HD3 ILE     9      38.840  40.770   9.650  1.00  0.00            
ATOM    131  C   ILE     9      36.310  41.220  13.160  1.00  0.00            
ATOM    132  O   ILE     9      35.240  41.370  12.580  1.00  0.00            
ATOM    133  N   NME    10      36.580  40.150  13.910  1.00  0.00            
ATOM    134  H   NME    10      37.420  40.190  14.480  1.00  0.00            
ATOM    135  CH3 NME    10      35.770  38.950  13.920  1.00  0.00            
ATOM    136 1HH3 NME    10      36.550  38.200  13.810  1.00  0.00            
ATOM    137 2HH3 NME    10      35.410  38.780  14.930  1.00  0.00            
ATOM    138 3HH3 NME    10      35.010  38.970  13.120  1.00  0.00            
TER
ENDMDL
MODEL        3
ATOM      1 1HH3 ACE     1      41.770  37.090  22.800  1.00  0.00            
ATOM      2  CH3 ACE     1      42.170  37.210  23.810  1.00  0.00            
ATOM      3 2HH3 ACE     1      41.560  36.730  24.570  1.00  0.00            
ATOM      4 3HH3 ACE     1      42.090  38.300  23.890  1.00  0.00            
ATOM      5  C   ACE     1      43.560  36.620  23.720  1.00  0.00            
ATOM      6  O   ACE     1      43.750  35.510  23.210  1.00  0.00            
ATOM      7  N   LEU     2      44.590  37.240  24.280  1.00  0.00            
ATOM      8  H   LEU     2      45.400  36.630  24.290  1.00  0.00            
ATOM      9  CA  LEU     2      44.640  38.380  25.180  1.00  0.00            
ATOM     10  HA  LEU     2      43.860  38.280  25.930  1.00  0.00            
ATOM     11  CB  LEU     2      45.970  38.220  25.920  1.00  0.00            
ATOM     12  HB1 LEU     2      46.730  38.030  25.160  1.00  0.00            
ATOM     13  HB2 LEU     2      45.850  37.350  26.550  1.00  0.00            
ATOM     14  CG  LEU     2      46.500  39.390  26.750  1.00  0.00            
ATOM     15  HG  LEU     2      46.600  40.290  26.150  1.00  0.00            
ATOM     16  CD1 LEU     2      45.480  39.840  27.800  1.00  0.00            
ATOM     17 1HD1 LEU     2      44.510  40.240  27.490  1.00  0.00            
ATOM     18 2HD1 LEU     2      45.270  38.960  28.390  1.00  0.00            
ATOM     19 3HD1 LEU     2      46.050  40.610  28.330  1.00  0.00            
ATOM     20  CD2 LEU     2      47.880  39.040  27.300  1.00  0.00            
ATOM     21 1HD2 LEU     2      48.180  39.870  27.960  1.00  0.00            
ATOM     22 2HD2 LEU     2      47.850  38.240  28.050  1.00  0.00            
ATOM     23 3HD2 LEU     2      48.530  38.820  26.450  1.00  0.00            
ATOM     24  C   LEU     2      44.480  39.730  24.500  1.00  0.00            
ATOM     25  O   LEU     2      43.910  40.680  25.040  1.00  0.00            
ATOM     26  N   NLE     3      44.940  39.760  23.250  1.00  0.00            
ATOM     27  H   NLE     3      45.550  39.040  22.900  1.00  0.00            
ATOM     28  CA  NLE     3      44.680  40.790  22.270  1.00  0.00            
ATOM     29  HA  NLE     3      45.050  41.750  22.640  1.00  0.00            
ATOM     30  CB  NLE     3      45.380  40.440  20.960  1.00  0.00            
ATOM     31  HB1 NLE     3      44.600  40.100  20.290  1.00  0.00            
ATOM     32  HB2 NLE     3      46.240  39.780  21.120  1.00  0.00            
ATOM     33  CG  NLE     3      45.940  41.750  20.430  1.00  0.00            
ATOM     34  HG1 NLE     3      45.180  42.530  20.520  1.00  0.00            
ATOM     35  HG2 NLE     3      46.900  42.010  20.870  1.00  0.00            
ATOM     36  CD  NLE     3      46.220  41.530  18.950  1.00  0.00            
ATOM     37  HD1 NLE     3      45.310  41.110  18.520  1.00  0.00            
ATOM     38  HD2 NLE     3      46.960  40.740  18.830  1.00  0.00            
ATOM     39  CE  NLE     3      46.460  42.830  18.210  1.00  0.00            
ATOM     40  HE1 NLE     3      46.130  42.720  17.170  1.00  0.00            
ATOM     41  HE2 NLE     3      47.520  43.070  18.210  1.00  0.00            
ATOM     42  HE3 NLE     3      45.840  43.600  18.670  1.00  0.00            
ATOM     43  C   NLE     3      43.180  40.910  22.030  1.00  0.00            
ATOM     44  O   NLE     3      42.410  39.950  22.030  1.00  0.00            
ATOM     45  N   VAL     4      42.710  42.140  21.810  1.00  0.00            
ATOM     46  H   VAL     4      43.380  42.900  21.880  1.00  0.00            
ATOM     47  CA  VAL     4      41.340  42.450  21.460  1.00  0.00            
ATOM     48  HA  VAL     4      40.620  42.120  22.210  1.00  0.00            
ATOM     49  CB  VAL     4      41.290  43.970  21.280  1.00  0.00            
ATOM     50  HB  VAL     4      40.310  44.190  20.880  1.00  0.00            
ATOM     51  CG1 VAL     4      41.330  44.730  22.600  1.00  0.00            
ATOM     52 1HG1 VAL     4      41.380  45.790  22.360  1.00  0.00            
ATOM     53 2HG1 VAL     4      40.370  44.640  23.110  1.00  0.00            
ATOM     54 3HG1 VAL     4      42.200  44.520  23.220  1.00  0.00            
ATOM     55  CG2 VAL     4      42.280  44.660  20.350  1.00  0.00            
ATOM     56 1HG2 VAL     4      42.120  45.740  20.260  1.00  0.00            
ATOM     57 2HG2 VAL     4      43.310  44.590  20.690  1.00  0.00            
ATOM     58 3HG2 VAL     4      42.230  44.250  19.340  1.00  0.00            
ATOM     59  C   VAL     4      41.080  41.850  20.080  1.00  0.00            
ATOM     60  O   VAL     4      41.920  41.900  19.190  1.00  0.00            
ATOM     61  N   PRO     5      39.840  41.480  19.780  1.00  0.00            
ATOM     62  CD  PRO     5      39.460  40.810  18.550  1.00  0.00            
ATOM     63  HD1 PRO     5      39.680  39.740  18.520  1.00  0.00            
ATOM     64  HD2 PRO     5      39.900  41.130  17.610  1.00  0.00            
ATOM     65  CG  PRO     5      37.940  40.770  18.490  1.00  0.00            
ATOM     66  HG1 PRO     5      37.680  39.930  17.860  1.00  0.00            
ATOM     67  HG2 PRO     5      37.610  41.750  18.100  1.00  0.00            
ATOM     68  CB  PRO     5      37.640  40.600  19.970  1.00  0.00            
ATOM     69  HB1 PRO     5      37.870  39.560  20.200  1.00  0.00            
ATOM     70  HB2 PRO     5      36.600  40.710  20.280  1.00  0.00            
ATOM     71  CA  PRO     5      38.600  41.640  20.520  1.00  0.00            
ATOM     72  HA  PRO     5      38.820  41.440  21.570  1.00  0.00            
ATOM     73  C   PRO     5      37.950  43.010  20.390  1.00  0.00            
ATOM     74  O   PRO     5      37.190  43.440  21.260  1.00  0.00            
ATOM     75  N   GLY     6      38.330  43.820  19.410  1.00  0.00            
ATOM     76  H   GLY     6      39.000  43.370  18.810  1.00  0.00            
ATOM     77  CA  GLY     6      37.880  45.180  19.190  1.00  0.00            
ATOM     78  HA1 GLY     6      37.030  45.330  19.850  1.00  0.00            
ATOM     79  HA2 GLY     6      37.560  45.260  18.150  1.00  0.00            
ATOM     80  C   GLY     6      38.890  46.280  19.520  1.00  0.00            
ATOM     81  O   GLY     6      38.870  46.770  20.650  1.00  0.00            
ATOM     82  N   VAL     7      39.810  46.610  18.610  1.00  0.00            
ATOM     83  H   VAL     7      40.520  47.150  19.070  1.00  0.00            
ATOM     84  CA  VAL     7      39.930  46.450  17.180  1.00  0.00            
ATOM     85  HA  VAL     7      39.140  47.030  16.720  1.00  0.00            
ATOM     86  CB  VAL     7      41.280  47.010  16.730  1.00  0.00            
ATOM     87  HB  VAL     7      41.370  47.920  17.340  1.00  0.00            
ATOM     88  CG1 VAL     7      42.520  46.130  16.830  1.00  0.00            
ATOM     89 1HG1 VAL     7      43.360  46.670  16.400  1.00  0.00            
ATOM     90 2HG1 VAL     7      42.590  45.770  17.860  1.00  0.00            
ATOM     91 3HG1 VAL     7      42.430  45.310  16.120  1.00  0.00            
ATOM     92  CG2 VAL     7      41.140  47.530  15.300  1.00  0.00            
ATOM     93 1HG2 VAL     7      41.050  46.700  14.590  1.00  0.00            
ATOM     94 2HG2 VAL     7      40.290  48.200  15.190  1.00  0.00            
ATOM     95 3HG2 VAL     7      42.100  48.010  15.080  1.00  0.00            
ATOM     96  C   VAL     7      39.840  45.030  16.670  1.00  0.00            
ATOM     97  O   VAL     7      40.420  44.100  17.240  1.00  0.00            
ATOM     98  N   VAL     8      39.020  44.810  15.630  1.00  0.00            
ATOM     99  H   VAL     8      38.670  45.610  15.100  1.00  0.00            
ATOM    100  CA  VAL     8      38.800  43.450  15.220  1.00  0.00            
ATOM    101  HA  VAL     8      38.870  42.810  16.100  1.00  0.00            
ATOM    102  CB  VAL     8      37.370  43.280  14.700  1.00  0.00            
ATOM    103  HB  VAL     8      37.150  43.970  13.890  1.00  0.00            
ATOM    104  CG1 VAL     8      37.080  41.830  14.330  1.00  0.00            
ATOM    105 1HG1 VAL     8      37.320  41.080  15.090  1.00  0.00            
ATOM    106 2HG1 VAL     8      36.020  41.820  14.080  1.00  0.00            
ATOM    107 3HG1 VAL     8      37.660  41.520  13.460  1.00  0.00            
ATOM    108  CG2 VAL     8      36.380  43.660  15.810  1.00  0.00            
ATOM    109 1HG2 VAL     8      35.320  43.630  15.580  1.00  0.00            
ATOM    110 2HG2 VAL     8      36.490  42.910  16.580  1.00  0.00            
ATOM    111 3HG2 VAL     8      36.670  44.690  16.060  1.00  0.00            
ATOM    112  C   VAL     8      39.880  42.900  14.290  1.00  0.00            
ATOM    113  O   VAL     8      40.310  43.600  13.380  1.00  0.00            
ATOM    114  N   ILE     9      40.280  41.660  14.560  1.00  0.00            
ATOM    115  H   ILE     9      39.990  41.270  15.430  1.00  0.00            
ATOM    116  CA  ILE     9      41.410  41.000  13.940  1.00  0.00            
ATOM    117  HA  ILE     9      41.670  41.420  12.960  1.00  0.00            
ATOM    118  CB  ILE     9      42.720  41.220  14.700  1.00  0.00            
ATOM    119  HB  ILE     9      43.450  40.610  14.180  1.00  0.00            
ATOM    120  CG2 ILE     9      43.290  42.620  14.470  1.00  0.00            
ATOM    121 1HG2 ILE     9      44.330  42.540  14.760  1.00  0.00            
ATOM    122 2HG2 ILE     9      43.360  42.850  13.410  1.00  0.00            
ATOM    123 3HG2 ILE     9      42.770  43.350  15.090  1.00  0.00            
ATOM    124  CG1 ILE     9      42.680  40.970  16.200  1.00  0.00            
ATOM    125 1HG1 ILE     9      41.990  41.670  16.670  1.00  0.00            
ATOM    126 2HG1 ILE     9      43.660  41.320  16.540  1.00  0.00            
ATOM    127  CD  ILE     9      42.630  39.540  16.710  1.00  0.00            
ATOM    128  HD1 ILE     9      41.610  39.180  16.580  1.00  0.00            
ATOM    129  HD2 ILE     9      43.280  38.930  16.060  1.00  0.00            
ATOM    130  HD3 ILE     9      42.940  39.460  17.750  1.00  0.00            
ATOM    131  C   ILE     9      41.160  39.520  13.680  1.00  0.00            
ATOM    132  O   ILE     9      40.360  38.880  14.360  1.00  0.00            
ATOM    133  N   NME    10      42.030  38.990  12.810  1.00  0.00            
ATOM    134  H   NME    10      42.450  39.580  12.100  1.00  0.00            
ATOM    135  CH3 NME    10      42.210  37.610  12.450  1.00  0.00            
ATOM    136 1HH3 NME    10      43.140  37.540  11.870  1.00  0.00            
ATOM    137 2HH3 NME    10      42.260  36.920  13.290  1.00  0.00            
ATOM    138 3HH3 NME    10      41.350  37.310  11.840  1.00  0.00            
TER
ENDMDL
MODEL        4
ATOM      1 1HH3 ACE     1      42.660  43.800  26.670  1.00  0.00            
ATOM      2  CH3 ACE     1      42.050  43.370  27.470  1.00  0.00            
ATOM      3 2HH3 ACE     1      41.070  43.830  27.420  1.00  0.00            
ATOM      4 3HH3 ACE     1      42.430  43.550  28.470  1.00  0.00            
ATOM      5  C   ACE     1      41.870  41.890  27.160  1.00  0.00            
ATOM      6  O   ACE     1      40.730  41.440  27.120  1.00  0.00            
ATOM      7  N   LEU     2      42.910  41.070  27.030  1.00  0.00            
ATOM      8  H   LEU     2      42.640  40.110  26.860  1.00  0.00            
ATOM      9  CA  LEU     2      44.320  41.410  27.080  1.00  0.00            
ATOM     10  HA  LEU     2      44.490  42.330  27.640  1.00  0.00            
ATOM     11  CB  LEU     2      45.090  40.280  27.750  1.00  0.00            
ATOM     12  HB1 LEU     2      46.100  40.260  27.360  1.00  0.00            
ATOM     13  HB2 LEU     2      44.560  39.350  27.530  1.00  0.00            
ATOM     14  CG  LEU     2      45.170  40.300  29.260  1.00  0.00            
ATOM     15  HG  LEU     2      44.170  40.450  29.680  1.00  0.00            
ATOM     16  CD1 LEU     2      45.740  39.070  29.970  1.00  0.00            
ATOM     17 1HD1 LEU     2      46.720  38.850  29.540  1.00  0.00            
ATOM     18 2HD1 LEU     2      45.950  39.330  31.010  1.00  0.00            
ATOM     19 3HD1 LEU     2      45.080  38.210  29.890  1.00  0.00            
ATOM     20  CD2 LEU     2      46.040  41.410  29.830  1.00  0.00            
ATOM     21 1HD2 LEU     2      45.790  41.670  30.870  1.00  0.00            
ATOM     22 2HD2 LEU     2      47.100  41.210  29.710  1.00  0.00            
ATOM     23 3HD2 LEU     2      45.920  42.360  29.310  1.00  0.00            
ATOM     24  C   LEU     2      44.820  41.850  25.700  1.00  0.00            
ATOM     25  O   LEU     2      45.440  42.910  25.650  1.00  0.00            
ATOM     26  N   NLE     3      44.470  41.050  24.700  1.00  0.00            
ATOM     27  H   NLE     3      43.970  40.220  24.950  1.00  0.00            
ATOM     28  CA  NLE     3      44.630  41.350  23.290  1.00  0.00            
ATOM     29  HA  NLE     3      45.260  42.240  23.230  1.00  0.00            
ATOM     30  CB  NLE     3      45.390  40.200  22.650  1.00  0.00            
ATOM     31  HB1 NLE     3      45.360  40.260  21.550  1.00  0.00            
ATOM     32  HB2 NLE     3      44.780  39.310  22.800  1.00  0.00            
ATOM     33  CG  NLE     3      46.800  39.950  23.190  1.00  0.00            
ATOM     34  HG1 NLE     3      46.730  39.770  24.260  1.00  0.00            
ATOM     35  HG2 NLE     3      47.150  39.020  22.760  1.00  0.00            
ATOM     36  CD  NLE     3      47.740  41.100  22.840  1.00  0.00            
ATOM     37  HD1 NLE     3      47.530  42.040  23.360  1.00  0.00            
ATOM     38  HD2 NLE     3      47.820  41.300  21.770  1.00  0.00            
ATOM     39  CE  NLE     3      49.140  40.680  23.270  1.00  0.00            
ATOM     40  HE1 NLE     3      49.850  41.500  23.200  1.00  0.00            
ATOM     41  HE2 NLE     3      49.460  39.830  22.660  1.00  0.00            
ATOM     42  HE3 NLE     3      49.180  40.430  24.330  1.00  0.00            
ATOM     43  C   NLE     3      43.270  41.610  22.640  1.00  0.00            
ATOM     44  O   NLE     3      42.270  41.040  23.110  1.00  0.00            
ATOM     45  N   VAL     4      43.220  42.430  21.600  1.00  0.00            
ATOM     46  H   VAL     4      44.100  42.770  21.240  1.00  0.00            
ATOM     47  CA  VAL     4      42.010  42.890  20.930  1.00  0.00            
ATOM     48  HA  VAL     4      41.190  42.850  21.650  1.00  0.00            
ATOM     49  CB  VAL     4      42.120  44.330  20.440  1.00  0.00            
ATOM     50  HB  VAL     4      41.170  44.650  20.030  1.00  0.00            
ATOM     51  CG1 VAL     4      42.200  45.170  21.710  1.00  0.00            
ATOM     52 1HG1 VAL     4      43.190  45.230  22.170  1.00  0.00            
ATOM     53 2HG1 VAL     4      41.900  46.160  21.320  1.00  0.00            
ATOM     54 3HG1 VAL     4      41.460  44.920  22.470  1.00  0.00            
ATOM     55  CG2 VAL     4      43.340  44.680  19.580  1.00  0.00            
ATOM     56 1HG2 VAL     4      43.010  45.600  19.080  1.00  0.00            
ATOM     57 2HG2 VAL     4      44.260  44.950  20.080  1.00  0.00            
ATOM     58 3HG2 VAL     4      43.490  43.980  18.760  1.00  0.00            
ATOM     59  C   VAL     4      41.720  42.070  19.690  1.00  0.00            
ATOM     60  O   VAL     4      42.640  41.730  18.960  1.00  0.00            
ATOM     61  N   PRO     5      40.460  41.840  19.330  1.00  0.00            
ATOM     62  CD  PRO     5      40.110  40.940  18.250  1.00  0.00            
ATOM     63  HD1 PRO     5      40.700  40.030  18.340  1.00  0.00            
ATOM     64  HD2 PRO     5      40.310  41.490  17.330  1.00  0.00            
ATOM     65  CG  PRO     5      38.610  40.630  18.350  1.00  0.00            
ATOM     66  HG1 PRO     5      38.310  39.710  17.850  1.00  0.00            
ATOM     67  HG2 PRO     5      38.040  41.360  17.780  1.00  0.00            
ATOM     68  CB  PRO     5      38.220  40.940  19.790  1.00  0.00            
ATOM     69  HB1 PRO     5      38.340  40.060  20.420  1.00  0.00            
ATOM     70  HB2 PRO     5      37.200  41.250  19.950  1.00  0.00            
ATOM     71  CA  PRO     5      39.300  41.940  20.200  1.00  0.00            
ATOM     72  HA  PRO     5      39.590  41.820  21.240  1.00  0.00            
ATOM     73  C   PRO     5      38.700  43.340  20.130  1.00  0.00            
ATOM     74  O   PRO     5      38.270  43.850  21.170  1.00  0.00            
ATOM     75  N   GLY     6      38.740  44.000  18.970  1.00  0.00            
ATOM     76  H   GLY     6      39.330  43.720  18.190  1.00  0.00            
ATOM     77  CA  GLY     6      38.130  45.300  18.780  1.00  0.00            
ATOM     78  HA1 GLY     6      37.380  45.610  19.510  1.00  0.00            
ATOM     79  HA2 GLY     6      37.680  45.480  17.810  1.00  0.00            
ATOM     80  C   GLY     6      39.170  46.390  18.940  1.00  0.00            
ATOM     81  O   GLY     6      39.310  46.850  20.070  1.00  0.00            
ATOM     82  N   VAL     7      39.970  46.830  17.960  1.00  0.00            
ATOM     83  H   VAL     7      40.760  47.360  18.310  1.00  0.00            
ATOM     84  CA  VAL     7      39.980  46.570  16.540  1.00  0.00            
ATOM     85  HA  VAL     7      39.060  47.040  16.200  1.00  0.00            
ATOM     86  CB  VAL     7      41.150  47.280  15.860  1.00  0.00            
ATOM     87  HB  VAL     7      42.110  47.080  16.340  1.00  0.00            
ATOM     88  CG1 VAL     7      41.320  46.800  14.420  1.00  0.00            
ATOM     89 1HG1 VAL     7      41.450  45.720  14.360  1.00  0.00            
ATOM     90 2HG1 VAL     7      40.420  47.080  13.870  1.00  0.00            
ATOM     91 3HG1 VAL     7      42.190  47.250  13.940  1.00  0.00            
ATOM     92  CG2 VAL     7      40.910  48.790  15.760  1.00  0.00            
ATOM     93 1HG2 VAL     7      41.840  49.190  15.350  1.00  0.00            
ATOM     94 2HG2 VAL     7      40.090  49.040  15.100  1.00  0.00            
ATOM     95 3HG2 VAL     7      40.670  49.300  16.690  1.00  0.00            
ATOM     96  C   VAL     7      40.000  45.070  16.310  1.00  0.00            
ATOM     97  O   VAL     7      40.900  44.380  16.760  1.00  0.00            
ATOM     98  N   VAL     8      39.000  44.600  15.570  1.00  0.00            
ATOM     99  H   VAL     8      38.390  45.310  15.180  1.00  0.00            
ATOM    100  CA  VAL     8      38.750  43.190  15.310  1.00  0.00            
ATOM    101  HA  VAL     8      39.060  42.630  16.190  1.00  0.00            
ATOM    102  CB  VAL     8      37.310  42.800  15.020  1.00  0.00            
ATOM    103  HB  VAL     8      37.110  43.270  14.050  1.00  0.00            
ATOM    104  CG1 VAL     8      37.090  41.290  14.840  1.00  0.00            
ATOM    105 1HG1 VAL     8      36.970  40.910  15.850  1.00  0.00            
ATOM    106 2HG1 VAL     8      36.240  41.140  14.160  1.00  0.00            
ATOM    107 3HG1 VAL     8      37.930  40.880  14.280  1.00  0.00            
ATOM    108  CG2 VAL     8      36.320  43.400  16.020  1.00  0.00            
ATOM    109 1HG2 VAL     8      36.660  43.040  16.990  1.00  0.00            
ATOM    110 2HG2 VAL     8      36.400  44.480  16.050  1.00  0.00            
ATOM    111 3HG2 VAL     8      35.310  43.170  15.680  1.00  0.00            
ATOM    112  C   VAL     8      39.680  42.750  14.190  1.00  0.00            
ATOM    113  O   VAL     8      39.820  43.520  13.240  1.00  0.00            
ATOM    114  N   ILE     9      40.310  41.580  14.380  1.00  0.00            
ATOM    115  H   ILE     9      40.110  40.990  15.170  1.00  0.00            
ATOM    116  CA  ILE     9      41.260  41.100  13.410  1.00  0.00            
ATOM    117  HA  ILE     9      41.300  41.700  12.490  1.00  0.00            
ATOM    118  CB  ILE     9      42.680  41.200  13.970  1.00  0.00            
ATOM    119  HB  ILE     9      43.290  40.950  13.110  1.00  0.00            
ATOM    120  CG2 ILE     9      43.060  42.630  14.310  1.00  0.00            
ATOM    121 1HG2 ILE     9      42.510  43.060  15.150  1.00  0.00            
ATOM    122 2HG2 ILE     9      44.130  42.620  14.510  1.00  0.00            
ATOM    123 3HG2 ILE     9      42.930  43.370  13.520  1.00  0.00            
ATOM    124  CG1 ILE     9      42.910  40.240  15.130  1.00  0.00            
ATOM    125 1HG1 ILE     9      42.240  39.390  15.000  1.00  0.00            
ATOM    126 2HG1 ILE     9      42.670  40.660  16.110  1.00  0.00            
ATOM    127  CD  ILE     9      44.340  39.720  15.100  1.00  0.00            
ATOM    128  HD1 ILE     9      44.400  39.030  15.950  1.00  0.00            
ATOM    129  HD2 ILE     9      44.590  39.230  14.160  1.00  0.00            
ATOM    130  HD3 ILE     9      45.080  40.490  15.270  1.00  0.00            
ATOM    131  C   ILE     9      40.860  39.700  12.960  1.00  0.00            
ATOM    132  O   ILE     9      40.090  39.040  13.650  1.00  0.00            
ATOM    133  N   NME    10      41.620  39.100  12.050  1.00  0.00            
ATOM    134  H   NME    10      42.220  39.720  11.510  1.00  0.00            
ATOM    135  CH3 NME    10      41.750  37.660  11.900  1.00  0.00            
ATOM    136 1HH3 NME    10      42.640  37.350  12.440  1.00  0.00            
ATOM    137 2HH3 NME    10      40.960  37.130  12.420  1.00  0.00            
ATOM    138 3HH3 NME    10      41.870  37.420  10.840  1.00  0.00            
TER
ENDMDL
MODEL        5
ATOM      1 1HH3 ACE     1      45.260  41.970  27.370  1.00  0.00            
ATOM      2  CH3 ACE     1      44.500  42.750  27.290  1.00  0.00            
ATOM      3 2HH3 ACE     1      44.330  42.890  26.220  1.00  0.00            
ATOM      4 3HH3 ACE     1      44.920  43.690  27.690  1.00  0.00            
ATOM      5  C   ACE     1      43.270  42.530  28.140  1.00  0.00            
ATOM      6  O   ACE     1      42.900  43.340  28.980  1.00  0.00            
ATOM      7  N   LEU     2      42.500  41.460  27.880  1.00  0.00            
ATOM      8  H   LEU     2      41.710  41.460  28.520  1.00  0.00            
ATOM      9  CA  LEU     2      42.760  40.320  27.030  1.00  0.00            
ATOM     10  HA  LEU     2      43.840  40.180  27.150  1.00  0.00            
ATOM     11  CB  LEU     2      42.000  39.090  27.520  1.00  0.00            
ATOM     12  HB1 LEU     2      40.980  39.390  27.360  1.00  0.00            
ATOM     13  HB2 LEU     2      42.270  38.910  28.560  1.00  0.00            
ATOM     14  CG  LEU     2      42.280  37.750  26.830  1.00  0.00            
ATOM     15  HG  LEU     2      42.400  37.940  25.760  1.00  0.00            
ATOM     16  CD1 LEU     2      43.640  37.270  27.310  1.00  0.00            
ATOM     17 1HD1 LEU     2      43.730  36.210  27.030  1.00  0.00            
ATOM     18 2HD1 LEU     2      44.520  37.750  26.880  1.00  0.00            
ATOM     19 3HD1 LEU     2      43.590  37.300  28.400  1.00  0.00            
ATOM     20  CD2 LEU     2      41.230  36.700  27.180  1.00  0.00            
ATOM     21 1HD2 LEU     2      41.550  35.680  26.930  1.00  0.00            
ATOM     22 2HD2 LEU     2      41.070  36.710  28.250  1.00  0.00            
ATOM     23 3HD2 LEU     2      40.320  37.020  26.680  1.00  0.00            
ATOM     24  C   LEU     2      42.620  40.640  25.540  1.00  0.00            
ATOM     25  O   LEU     2      43.560  40.200  24.880  1.00  0.00            
ATOM     26  N   NLE     3      41.590  41.330  25.070  1.00  0.00            
ATOM     27  H   NLE     3      40.770  41.570  25.600  1.00  0.00            
ATOM     28  CA  NLE     3      41.500  41.840  23.710  1.00  0.00            
ATOM     29  HA  NLE     3      41.830  41.060  23.050  1.00  0.00            
ATOM     30  CB  NLE     3      40.080  42.320  23.460  1.00  0.00            
ATOM     31  HB1 NLE     3      40.110  42.940  22.570  1.00  0.00            
ATOM     32  HB2 NLE     3      39.710  42.960  24.270  1.00  0.00            
ATOM     33  CG  NLE     3      39.040  41.240  23.180  1.00  0.00            
ATOM     34  HG1 NLE     3      39.450  40.450  22.530  1.00  0.00            
ATOM     35  HG2 NLE     3      38.780  40.690  24.080  1.00  0.00            
ATOM     36  CD  NLE     3      37.670  41.790  22.750  1.00  0.00            
ATOM     37  HD1 NLE     3      37.870  42.360  21.850  1.00  0.00            
ATOM     38  HD2 NLE     3      37.370  42.350  23.620  1.00  0.00            
ATOM     39  CE  NLE     3      36.750  40.600  22.470  1.00  0.00            
ATOM     40  HE1 NLE     3      36.670  39.930  23.330  1.00  0.00            
ATOM     41  HE2 NLE     3      37.100  40.000  21.640  1.00  0.00            
ATOM     42  HE3 NLE     3      35.730  40.930  22.240  1.00  0.00            
ATOM     43  C   NLE     3      42.440  43.010  23.440  1.00  0.00            
ATOM     44  O   NLE     3      42.840  43.780  24.320  1.00  0.00            
ATOM     45  N   VAL     4      42.770  43.140  22.160  1.00  0.00            
ATOM     46  H   VAL     4      42.260  42.570  21.490  1.00  0.00            
ATOM     47  CA  VAL     4      43.510  44.270  21.650  1.00  0.00            
ATOM     48  HA  VAL     4      44.380  44.600  22.230  1.00  0.00            
ATOM     49  CB  VAL     4      44.170  43.850  20.340  1.00  0.00            
ATOM     50  HB  VAL     4      44.890  44.580  19.990  1.00  0.00            
ATOM     51  CG1 VAL     4      45.040  42.640  20.660  1.00  0.00            
ATOM     52 1HG1 VAL     4      44.430  41.740  20.650  1.00  0.00            
ATOM     53 2HG1 VAL     4      45.830  42.480  19.920  1.00  0.00            
ATOM     54 3HG1 VAL     4      45.500  42.750  21.640  1.00  0.00            
ATOM     55  CG2 VAL     4      43.170  43.680  19.200  1.00  0.00            
ATOM     56 1HG2 VAL     4      43.660  43.010  18.480  1.00  0.00            
ATOM     57 2HG2 VAL     4      42.290  43.180  19.600  1.00  0.00            
ATOM     58 3HG2 VAL     4      42.870  44.590  18.670  1.00  0.00            
ATOM     59  C   VAL     4      42.490  45.390  21.450  1.00  0.00            
ATOM     60  O   VAL     4      41.280  45.170  21.380  1.00  0.00            
ATOM     61  N   PRO     5      42.880  46.660  21.340  1.00  0.00            
ATOM     62  CD  PRO     5      41.960  47.770  21.400  1.00  0.00            
ATOM     63  HD1 PRO     5      41.430  47.730  22.360  1.00  0.00            
ATOM     64  HD2 PRO     5      41.100  47.730  20.720  1.00  0.00            
ATOM     65  CG  PRO     5      42.730  49.090  21.410  1.00  0.00            
ATOM     66  HG1 PRO     5      42.330  49.810  22.120  1.00  0.00            
ATOM     67  HG2 PRO     5      42.930  49.480  20.420  1.00  0.00            
ATOM     68  CB  PRO     5      44.090  48.610  21.920  1.00  0.00            
ATOM     69  HB1 PRO     5      43.980  48.510  23.000  1.00  0.00            
ATOM     70  HB2 PRO     5      44.950  49.210  21.620  1.00  0.00            
ATOM     71  CA  PRO     5      44.220  47.210  21.300  1.00  0.00            
ATOM     72  HA  PRO     5      44.910  46.710  21.980  1.00  0.00            
ATOM     73  C   PRO     5      44.910  47.390  19.960  1.00  0.00            
ATOM     74  O   PRO     5      46.120  47.630  19.980  1.00  0.00            
ATOM     75  N   GLY     6      44.230  47.280  18.820  1.00  0.00            
ATOM     76  H   GLY     6      43.220  47.220  18.870  1.00  0.00            
ATOM     77  CA  GLY     6      44.850  46.970  17.550  1.00  0.00            
ATOM     78  HA1 GLY     6      45.860  47.390  17.470  1.00  0.00            
ATOM     79  HA2 GLY     6      44.330  47.530  16.760  1.00  0.00            
ATOM     80  C   GLY     6      44.910  45.510  17.130  1.00  0.00            
ATOM     81  O   GLY     6      45.930  44.890  17.440  1.00  0.00            
ATOM     82  N   VAL     7      44.020  44.840  16.410  1.00  0.00            
ATOM     83  H   VAL     7      44.270  43.880  16.300  1.00  0.00            
ATOM     84  CA  VAL     7      42.650  45.210  16.080  1.00  0.00            
ATOM     85  HA  VAL     7      42.320  46.110  16.590  1.00  0.00            
ATOM     86  CB  VAL     7      42.460  45.600  14.610  1.00  0.00            
ATOM     87  HB  VAL     7      41.420  45.900  14.480  1.00  0.00            
ATOM     88  CG1 VAL     7      43.270  46.830  14.210  1.00  0.00            
ATOM     89 1HG1 VAL     7      44.330  46.630  14.390  1.00  0.00            
ATOM     90 2HG1 VAL     7      43.110  47.000  13.160  1.00  0.00            
ATOM     91 3HG1 VAL     7      42.930  47.710  14.760  1.00  0.00            
ATOM     92  CG2 VAL     7      42.890  44.470  13.680  1.00  0.00            
ATOM     93 1HG2 VAL     7      42.230  43.600  13.780  1.00  0.00            
ATOM     94 2HG2 VAL     7      42.860  44.810  12.650  1.00  0.00            
ATOM     95 3HG2 VAL     7      43.920  44.190  13.910  1.00  0.00            
ATOM     96  C   VAL     7      41.730  44.050  16.410  1.00  0.00            
ATOM     97  O   VAL     7      42.100  42.870  16.350  1.00  0.00            
ATOM     98  N   VAL     8      40.480  44.410  16.700  1.00  0.00            
ATOM     99  H   VAL     8      40.350  45.390  16.600  1.00  0.00            
ATOM    100  CA  VAL     8      39.280  43.570  16.720  1.00  0.00            
ATOM    101  HA  VAL     8      39.550  42.520  16.770  1.00  0.00            
ATOM    102  CB  VAL     8      38.510  43.900  18.000  1.00  0.00            
ATOM    103  HB  VAL     8      38.320  44.970  17.950  1.00  0.00            
ATOM    104  CG1 VAL     8      37.240  43.080  18.060  1.00  0.00            
ATOM    105 1HG1 VAL     8      37.450  42.010  18.170  1.00  0.00            
ATOM    106 2HG1 VAL     8      36.670  43.370  18.950  1.00  0.00            
ATOM    107 3HG1 VAL     8      36.650  43.240  17.170  1.00  0.00            
ATOM    108  CG2 VAL     8      39.360  43.630  19.230  1.00  0.00            
ATOM    109 1HG2 VAL     8      39.830  42.640  19.140  1.00  0.00            
ATOM    110 2HG2 VAL     8      40.110  44.390  19.440  1.00  0.00            
ATOM    111 3HG2 VAL     8      38.730  43.710  20.110  1.00  0.00            
ATOM    112  C   VAL     8      38.530  43.630  15.410  1.00  0.00            
ATOM    113  O   VAL     8      38.330  44.660  14.760  1.00  0.00            
ATOM    114  N   ILE     9      37.960  42.480  15.030  1.00  0.00            
ATOM    115  H   ILE     9      38.280  41.670  15.550  1.00  0.00            
ATOM    116  CA  ILE     9      37.300  42.300  13.750  1.00  0.00            
ATOM    117  HA  ILE     9      37.030  43.280  13.370  1.00  0.00            
ATOM    118  CB  ILE     9      38.240  41.670  12.720  1.00  0.00            
ATOM    119  HB  ILE     9      37.650  41.440  11.830  1.00  0.00            
ATOM    120  CG2 ILE     9      39.230  42.730  12.280  1.00  0.00            
ATOM    121 1HG2 ILE     9      38.720  43.590  11.850  1.00  0.00            
ATOM    122 2HG2 ILE     9      39.850  42.950  13.160  1.00  0.00            
ATOM    123 3HG2 ILE     9      39.890  42.330  11.500  1.00  0.00            
ATOM    124  CG1 ILE     9      38.790  40.300  13.150  1.00  0.00            
ATOM    125 1HG1 ILE     9      38.910  39.750  12.230  1.00  0.00            
ATOM    126 2HG1 ILE     9      38.070  39.760  13.780  1.00  0.00            
ATOM    127  CD  ILE     9      40.190  40.370  13.760  1.00  0.00            
ATOM    128  HD1 ILE     9      40.880  40.750  13.010  1.00  0.00            
ATOM    129  HD2 ILE     9      40.080  40.960  14.670  1.00  0.00            
ATOM    130  HD3 ILE     9      40.470  39.350  14.030  1.00  0.00            
ATOM    131  C   ILE     9      35.990  41.560  13.900  1.00  0.00            
ATOM    132  O   ILE     9      35.730  40.840  14.880  1.00  0.00            
ATOM    133  N   NME    10      35.190  41.650  12.830  1.00  0.00            
ATOM    134  H   NME    10      35.540  42.160  12.040  1.00  0.00            
ATOM    135  CH3 NME    10      33.980  40.870  12.720  1.00  0.00            
ATOM    136 1HH3 NME    10      33.700  41.100  11.690  1.00  0.00            
ATOM    137 2HH3 NME    10      34.110  39.790  12.640  1.00  0.00            
ATOM    138 3HH3 NME    10      33.180  41.270  13.360  1.00  0.00            
TER
ENDMDL
END
